# Supplementary material for: Sedimentary record from the Canada Basin, Arctic Ocean: implications for late to middle Pleistocene glacial history
Source: Copernicus journal article supplement (doi:10.5194/cp-13-511-2017), 2017-05-23
Supplement: Supplementary file 1 [file cp-13-511-2017-supplement.zip]

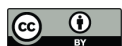

## *Supplement of*

# **Sedimentary record from the Canada Basin, Arctic Ocean: implications for late to middle Pleistocene glacial history**

**Linsen Dong et al.**

*Correspondence to:* Xuefa Shi (xfshi@fio.org.cn)

- cp-13-511-2017-supplement-title-page.pdf
- Dong et al suppl data 0408.xlsx

The copyright of individual parts of the supplement might differ from the CC-BY 3.0 licence.
