# Supplementary material for: Sedimentary record from the Canada Basin, Arctic Ocean: implications for late to middle Pleistocene glacial history
Source: Copernicus journal article supplement (doi:10.5194/cp-13-511-2017), 2017-05-23
Supplement: Supplementary file 1 [file Dong et al suppl data 0408.xlsx]

## Sheet: S1
Table S1. Downcore distribution of proxies discussed in the paper (Figs. 3-5)
Depth (cm)	Lightness (%)	Ca/Al(XRF)	Mn/Al(XRF)	Ca/Al(OES)	Mn/Al(OES)	Planktic Foram. (% >63mm grains)	Magn. Suscept. (*10^-6) (SI)	Inclination (°)	Sand (%)	Silt (%)	Clay (%)	63-250μm (%)	250-2000μm (%)	smectite(%)	illite (%)	kaolinite (%)	chlorite (%)	quartz (%)	K-feldspar (%)	plagioclase (%)	calcite (%)	pyroxene (%)	dolomite (%)	other mins (%)	Qua/Fsp	Kfs/Plag
1	41.4188			0.805424	0.0624901	15	8.217		7.642	42.379	49.98	6.254	1.388	2.39682	64.9267	12.3666	20.3099	30.1381	16.2676	15.0583	11.6764	6.48388	20.0994	0.276266	0.962081	1.08031
2	40.2176
3	38.3124					66			10.281	44.648	45.071	9.483	0.798	2.32769	67.3634	11.7053	18.6037
4	42.7465
5	45.8781			0.722389	0.0543035	62	8.251	72	7.148	43.575	49.276	5.562	1.586	2.40338	67.37	12.1174	18.1092	34.2612	18.0215	13.8271	11.2825	3.73123	18.8764	0	1.07575	1.30335
6	42.7911
7	44.7052					46			6.397	47.248	46.351	6.337	0.06
8	42.1896
9	43.1256			0.822617	0.0570688	6.33333	8.09	35.4	8.019	46.892	45.088	6.473	1.546	3.76385	68.7688	10.7848	16.6825	36.403	10.7758	13.1856	12.3929	5.79245	21.4502	0	1.51923	0.817236
10	45.3428
11	43.3191			0.696981	0.0288233	52.3333			4.533	45.971	49.495	3.636	0.897					31.0996	15.9363	13.2385	7.74879	5.88619	26.0906	0	1.06598	1.20379
12	44.0784
13	41.4592					45.6667	9.033	15.2	8.405	41.851	49.746	6.998	1.407
14	41.4497
15	40.0854			1.44491	0.0778953	71			2.446	45.33	52.226	2.446	0	2.32893	67.9339	11.0808	18.6564	28.5578	15.0998	15.9966	8.85389	4.8989	26.5931	0	0.918367	0.943939
16	40.3907
17	45.9267	139.536	3.29558	1.81746	0.0279077	25.3333	12.39	-67.8	13.149	46.141	40.711	10.329	2.82	1.45833	69.3998	11.6357	17.5061	20.2734	7.94316	7.78358	11.574	0	52.4258	0	1.28911	1.0205
18	46.2165	88.931	5.43021
19	39.1459	54.3698	6.67554	2.76324	0.0626751	14.3333			18.523	48.657	32.82	15.385	3.138	1.45962	65.2985	14.175	19.0668	20.7278	9.98979	7.503	15.8139	0	45.2618	0.70368	1.18493	1.33144
20	34.511	25.2527	9.10682
21	32.7408	16.5221	10.6986	1.27038	0.112357	54.3333	8.263	53.8	12.563	43.611	43.826	10.485	2.078	3.49128	61.2209	14.13	21.1578	35.7092	11.7683	13.9788	22.6989	0	15.8449	0	1.38692	0.841867
22	30.6017	13.2877	11.9015
23	31.0115	10.5892	10.8793			68.6667			20.309	43.14	36.553	16.907	3.402
24	31.5209	6.58647	5.389
25	32.7985	3.76922	2.166	0.277824	0.0600134	11	6.785	7.9	19.58	43.936	36.486	15.669	3.911	4.65213	54.105	21.0985	20.1444	35.5332	22.8486	26.7263	5.49925	8.176	1.2167	0	0.716758	0.854912
26	38.1214	2.80588	1.78463
27	40.0696	2.93137	1.28968	0.0981002	0.0165793	3.66667			16.175	48.461	35.361	12.328	3.847	4.17996	46.0673	26.8355	22.9172	34.0202	19.5742	37.3074	3.18056	5.42523	0.492431	0	0.598088	0.524672
28	41.4213	2.23622	0.529152
29	43.4092	5.2574	0.735931			0.666667	6.842	57.6	23.9	49.311	26.79	20.531	3.369
30	44.6781	7.23642	0.570714
31	44.3778	4.27452	0.629795	0.15006	0.00981514	0.666667			17.602	52.467	29.932	14.263	3.339	4.33793	47.0823	19.6391	28.9406	47.7458	18.8408	23.7318	2.32615	5.47699	1.87841	0	1.12151	0.793906
32	40.1737	3.54282	0.925157
33	41.9968	2.81261	2.55824			0.666667	6.249	61.3	6.167	33.649	60.187	5.642	0.525
34	45.1201	3.56791	1.97595
35	46.1795	6.49543	1.77493	0.118576	0.0222279	3.66667			5.25	36.477	58.276	4.792	0.458	3.11112	63.7929	12.1628	20.9331	32.874	20.5941	26.6746	4.18522	13.173	2.49922	0	0.695471	0.772049
36	43.9144	6.29179	1.76833
37	42.6711	7.02327	1.70083			1	9.705		2.395	39.338	58.267	2.395	0
38	45.089	5.91727	0.9305
39	42.3772	8.47815	0.870602	0.142891	0.0125611	0.666667			31.859	45.936	22.208	29.262	2.597	7.5684	46.9352	19.7658	25.7306	38.6039	16.3854	34.1339	4.23594	5.00364	1.63717	0	0.76414	0.480034
40	42.8659	6.11308	0.734573
41	43.5883	5.47312	0.678041	0.166513	0.00994632	3.66667	7.004	76.7	25.48	49.426	25.097	21.995	3.485	4.87607	48.1209	24.8125	22.1905	41.2941	20.0796	29.1609	1.96708	6.25526	1.243	0	0.838619	0.68858
42	45.0528	6.74138	1.80381
43	42.0544	15.908	5.35987			80.6667			20.965	52.274	26.763	16.319	4.646
44	32.0552	22.4955	6.70742
45	35.1289	25.9636	5.69561	0.808067	0.0815625	73.3333	10.48	45.9	6.606	46.787	46.606	5.145	1.461	2.94953	64.8779	11.5372	20.6354	27.8737	13.1676	17.2488	11.0236	8.47781	22.2085	0	0.916403	0.763389
46	38.813	37.7972	4.29312
47	42.9976	41.5498	3.78634	1.43973	0.0449754	83.6667			13.158	46.719	40.124	10.578	2.58	1.67888	64.1697	12.8563	21.2951	25.1957	11.9474	11.7731	8.32977	4.03717	38.7168	0	1.06219	1.01481
48	45.3326	34.5356	2.8247
49	42.3141	27.5274	2.84119			68	9.819	48	11.247	46.347	42.402	9.553	1.694
50	46.3315	17.1207	3.10033
51	44.8259	14.2689	4.91781	0.52152	0.0387366	49			12.503	42.794	44.704	9.382	3.121
52	36.7191	14.5921	9.61305
53	38.1028	16.9687	5.33333				7.179	57.4						1.624	67.4592	11.3711	19.5456	37.7131	14.961	16.0845	9.11444	5.14807	16.9789	0	1.21477	0.930153
54	34.6764	12.8748	6.0139
55	32.1211	12.23	5.92275	0.591956	0.08191	70			9.914	46.865	43.222	8.109	1.805	1.94517	63.1843	12.3875	22.483	32.5756	15.4501	21.1403	13.0138	5.9884	11.8319	0	0.890277	0.730835
56	39.2856	11.6729	5.42474
57	43.7016	9.33041	4.15351	0.48902	0.0747472	83.3333	8.84		7.325	44.289	48.385	6.67	0.655	1.04691	63.8218	13.1242	22.0071	34.8953	13.1182	25.7997	10.0423	6.28412	9.11567	0.744744	0.896642	0.508462
58	44.3681	9.79471	2.24432
59	44.8909	50.2712	3.01324	0.471175	0.0317997	50			4.341	46.53	49.127	3.525	0.816	2.115	62.9474	12.3886	22.549	32.519	12.9687	15.1066	4.56747	4.62843	30.2098	0	1.15828	0.858482
60	43.1166	59.9522	6.96117
61	37.9629	37.2618	15.1944	0.707496	0.0369919	47.6667	7.587	73.4	7.346	43.38	49.277	6.496	0.85	1.47039	62.5454	13.4933	22.4909	33.4296	13.6021	12.2048	8.16142	6.04167	26.5604	0	1.29538	1.11449
62	35.7791	29.8505	18.6963
63	30.4064	27.6493	20.4263			98			3.27	43.036	53.693	3.27	0
64	33.573	28.3646	20.2347
65	31.5578	20.6158	11.0512	0.72302	0.142785	99.3333	8.934	59.6	4.409	44.123	51.467	4.235	0.174	2.11426	64.3045	13.2354	20.3458	26.5637	18.3014	15.758	16.8277	5.9903	16.5589	0	0.779923	1.1614
66	32.9184	22.2894	9.46651
67	37.1932	14.4648	4.85048	0.663695	0.100275	76.6667			2.113	41.715	56.172	2.113	0	1.55493	64.4918	13.4581	20.4951	31.0045	16.504	22.9849	14.4846	5.25972	9.76226	0	0.785147	0.718038
68	41.2512	10.9473	2.82094
69	40.9536	10.3871	5.19005	0.38144	0.0486443		9.807	74.1	1.367	40.022	58.61	1.367	0	2.30159	64.9362	11.3701	21.3921	32.0912	17.1078	20.337	8.52473	7.08256	14.8567	0	0.857027	0.841214
70	41.847	5.90277	4.95545
71	41.3044	9.24455	4.78083			76			3.888	44.623	51.49	2.102	1.786
72	40.2758	10.3489	3.90212
73	37.6883	14.8606	5.87831	0.410063	0.063704	79.6667	11.32	82.3	1.624	50.817	47.56	1.592	0.032	2.26769	65.5646	12.3976	19.7701	35.9038	13.0546	25.5222	7.00826	5.41918	12.2159	0.8761	0.930713	0.511499
74	37.7651	20.7339	5.84899
75	38.1943	40.8053	4.12884			75.3333			9.057	51.475	39.467	7.565	1.492
76	39.6388	59.9806	3.40713
77	44.5045	74.0213	1.48474	2.13818	0.0321325	43.3333	10.86	81	18.958	43.323	37.718	15.359	3.599	0.00653061	61.6403	19.9253	18.4279	29.1825	6.97077	7.82476	10.5974	2.397	43.0276	0	1.97239	0.890861
78	47.8552	91.7219	2.49891
79	39.821	57.353	3.48232			42.3333			11.916	42.695	45.39	11.185	0.731
80	42.5877	31.69	3.68568
81	39.8742	19.316	4.46996	0.932935	0.0595394	94	8.404	42.2	5.705	41.684	52.613	4.717	0.988	1.27392	68.5914	10.4739	19.6607	24.9483	11.5429	18.7207	11.0599	4.12868	28.8739	0.725647	0.824365	0.616585
82	38.5629	12.5481	3.72161
83	39.7523	11.1083	4.70331	0.499768	0.0637693	91			6.615	46.689	46.696	6.615	0	2.72924	66.7391	11.7451	18.7866	29.5884	19.2529	19.947	11.6315	10.0486	9.53163	0	0.754811	0.965202
84	38.3838	14.728	6.8
85	34.7001	20.5218	7.61212	0.693398	0.0846158	78.3333	11.37	45	8.291	49.209	42.501	8.228	0.063	1.43469	66.4175	11.2656	20.8822	33.119	14.4347	21.6574	16.976	5.23798	8.57491	0	0.917626	0.666501
86	36.5983	19.3216	6.88778
87	37.9145	11.8885	5.09625	0.481769	0.0552544	59.3333			10.007	52.524	37.47	10.007	0	2.21603	64.6432	12.9295	20.2112	34.9012	15.6598	29.2649	7.91144	4.75878	4.55546	2.94842	0.776884	0.535105
88	39.8639	7.1896	2.55989
89	41.1908	6.537	1.8853			13	15.04	73.9	16.538	52.488	30.974	14.88	1.658
90	43.0968	5.51772	1.34166
91	45.3066	5.00693	1.31328	0.138303	0.0135804				14.186	58.694	27.118	12.24	1.946	3.30009	55.5011	14.7367	26.462	34.071	21.6194	36.6247	1.24566	3.93168	1.6176	0.889996	0.584969	0.590294
92	43.1003	4.86108	1.1163
93	43.8523	4.70917	1.06836			3.66667	22.38	59.3	17.195	60.365	22.439	16.242	0.953
94	43.3365	5.05951	1.11314
95	44.6078	4.75578	1.03473	0.114349	0.0103136	0.666667			16.163	60.937	22.901	15.585	0.578	3.48786	52.0368	18.0896	26.3858	38.535	18.3083	33.8081	0.522709	6.99769	0.418538	1.40969	0.739402	0.541535
96	44.9515	4.28819	0.823734
97	45.5122	3.40845	1.03564			1.33333	13.11	78.6	19.324	58.06	22.615	18.358	0.966
98	45.5326	3.59058	1.48459
99	45.6458	5.78455	1.06911	0.375672	0.0258343	0.666667			7.114	38.599	54.288	5.443	1.671	1.29372	69.5413	11.6394	17.5256	50.9738	13.2853	16.7817	8.31428	7.90736	2.73754	0	1.69534	0.791657
100	47.4587	15.7755	0.500038
101	47.0434	11.0217	0.635441			1	5.943	58.8	12.963	41.549	45.487	10.04	2.923
102	47.8313	4.6015	1.26942
103	46.7227	5.19602	1.0788	0.186075	0.0160605	0.666667			7.471	45.671	46.86	6.52	0.951	0.00163927	71.8198	9.85651	18.322	41.4201	17.1055	22.5786	1.83727	9.64265	7.4158	0	1.04374	0.757599
104	48.5604	4.037	0.78672
105	47.7589	4.94206	1.28047			4.66667	10.12	81.1	7.093	51.628	41.278	5.577	1.516
106	45.4703	4.52236	1.86631
107	44.6925	6.67822	2.63235	0.340848	0.0451948	91.6667			6.627	44.874	48.499	5.172	1.455	1.46291	72.227	10.6348	15.6753	38.7725	14.2989	24.3402	7.6262	7.2472	6.75665	0.958282	1.00345	0.58746
108	40.4728	12.9736	4.55793
109	38.7611	14.7568	4.2333	0.723622	0.0623819	89.6667	9.645	77	4.01	46.123	49.866	3.197	0.813	1.1477	70.2962	10.0551	18.5011	33.2352	11.3448	15.6343	11.8648	4.30107	22.3348	1.28517	1.23189	0.725639
110	35.9003	18.3858	4.30786
111	39.7374	22.0628	4.4487			77			7.616	38.207	54.175	6.128	1.488
112	39.7453	20.6447	3.95674
113	38.8868	18.1512	4.08913	0.670267	0.0544501	60.6667	10.43	76.5	10.856	46.927	42.214	9.242	1.614	0.996032	70.0317	10.5993	18.373	29.3336	16.9163	15.3243	8.44849	8.97286	20.3004	0.704051	0.909834	1.10389
114	39.7885	16.8119	3.99151
115	40.181	14.9499	2.94351			14			12.328	48.69	38.981	9.666	2.662
116	43.7099	12.8267	2.94307
117	38.901	8.07379	3.65654	0.415591	0.0579448	60.6667	12.64	37.6	6.179	54.358	39.462	6.179	0	0.828113	68.6974	11.48	18.9944	36.1797	15.0906	17.5042	6.60709	7.26205	15.9418	1.41456	1.10998	0.862111
118	39.6555	7.34544	4.61792
119	38.7437	7.33247	4.88853			54			7.809	52.785	39.406	6.68	1.129
120	39.5662	5.9282	4.22691
121	39.6234	6.71791	3.34726	0.302775	0.0531189	15	10.64	-67.8	9.491	39.83	50.675	6.492	2.999	1.26554	69.7335	10.4394	18.5616	30.9147	20.8012	16.1819	3.41761	6.47729	21.4709	0.736409	0.835913	1.28546
122	42.3091	12.7148	3.71502
123	40.5088	17.3226	3.39935			1.33333			15.42	41.669	42.906	11.963	3.457
124	44.0342	22.9694	2.75055
125	43.8896	23.6618	3.18268	0.55091	0.0388678	1.33333	10.78	-48.4	13.107	42.426	44.468	9.824	3.283	1.37288	70.1402	10.3452	18.1417	30.323	17.2253	15.0201	3.84907	6.6851	26.8974	0	0.940381	1.14682
126	41.8099	12.6942	3.94978
127	37.8419	10.7891	5.16202			6.33333			8.752	44.773	46.473	6.5	2.252
128	41.1708	6.92701	5.06195
129	39.4555	6.32447	5.30078	0.225426	0.0675677	22.3333	11.54	-68.7	6.631	48.775	44.594	5.05	1.581	1.88226	68.5999	10.6905	18.8273	35.6489	19.7745	21.5048	3.78647	10.1713	9.11406	0	0.863601	0.919538
130	37.5864	6.46303	4.9235
131	38.8164	7.76338	5.15262			31.3333			8.949	47.44	43.614	6.887	2.062
132	40.1577	9.31086	5.39782
133	39.207	12.4796	5.43131	0.398052	0.0697145	20.3333	9.418	-56.6	9.312	48.233	42.459	8.094	1.218	1.87546	67.3222	10.8329	19.9695	31.4823	17.6853	20.1957	7.03784	12.1999	11.3989	0	0.831085	0.875696
134	38.7919	15.3616	4.70953
135	39.6485	17.4442	4.08304			21.3333			13.839	47.029	39.131	10.062	3.777
136	40.7054	22.1803	4.21166
137	42.9019	27.4684	2.63606	0.90803	0.0422281	1.33333	34.8		17.363	50.138	32.5	13.192	4.171	2.523	62.8943	17.2708	17.3119	29.3544	13.0694	15.0046	2.10779	4.59121	35.8725	0	1.04561	0.871026
138	42.18	29.8363	2.08466
139	46.1631	35.3501	1.4876	1.1881	0.0607133	0.333333			22.162	48.143	29.696	16.015	6.147	1.08672	65.3463	16.3386	17.2283	29.635	14.1932	10.7574	2.76864	5.69526	36.9504	0	1.18774	1.31939
140	48.9142	26.4606	1.94535
141	45.2675	19.5711	2.56569	0.801555	0.039629	1	12.34	-79.6	14.462	47.213	38.326	10.645	3.817	1.03325	68.9617	11.2351	18.7699	32.8992	13.0599	16.6698	2.15507	8.62614	26.5899	0	1.10661	0.783446
142	40.1512	23.5181	2.4538
143	43.0612	22.7245	2.02398	0.734965	0.0358925	0			10.773	45.744	43.483	7.872	2.901	1.82223	66.9629	11.168	20.0468	25.5574	13.4252	16.1477	1.97058	6.97484	35.9243	0	0.864217	0.831403
144	44.4378	20.5918	2.28523
145	44.2124	19.6001	2.67469			0.666667	12.12	-78.7	6.533	51.074	42.394	5.37	1.163
146	40.5975	25.8973	3.46559
147	41.2795	46.1489	2.73022	1.77659	0.0369328	0			9.799	52.424	37.777	9.722	0.077	1.17355	65.5639	12.791	20.4715	21.7951	10.063	8.73452	4.64643	3.85502	50.906	0	1.15947	1.15209
148	47.3264	87.9722	1.24109
149	51.4522	108.986	0.891789	2.64612	0.014106	0.666667	13.65	-79	15.82	53.26	30.919	12.156	3.664	0.00292547	65.292	18.713	15.9921	20.0017	15.567	2.63856	6.48205	2.69122	52.6195	0	1.09866	5.8998
150	48.2171	58.7315	0.986358
151	49.0232	48.9385	0.795539	1.51836	0.0178279	0			20.164	49.162	30.673	17.731	2.433	0.00246851	72.4199	10.5316	17.0459	24.2739	17.8999	10.5887	1.01826	4.98784	40.4658	0.76556	0.852058	1.69048
152	49.7328	30.7546	1.68903
153	42.5961	14.2444	2.58453	0.511772	0.0361309	0.666667	9.726	-75.3	11.749	50.95	37.304	9.48	2.269	1.17101	70.0314	10.067	18.7306	28.6846	15.8238	16.413	0.974193	4.5554	32.7008	0.848305	0.889809	0.9641
154	42.459	11.8846	3.23488
155	39.7302	9.40677	3.84112			1			7.145	52.259	40.598	5.336	1.809
156	41.4739	10.7747	3.40739
157	39.4078	10.9261	6.261	0.191252	0.0490484	1.33333	13.53	-68.7	8.698	52.029	39.272	6.711	1.987	1.31111	69.2592	10.0535	19.3762	39.8682	17.9259	24.7214	0.876749	7.53714	8.22406	0.846646	0.934836	0.725116
158	40.0116	12.5287	6.41717
159	41.8709	13.9632	5.32034			2.33333			2.665	56.837	40.501	2.665	0
160	42.6012	14.276	4.31569
161	42.251	18.5732	3.93209	0.310291	0.0385394	1.33333	11.25	-83.3	6.41	51.421	42.171	5.337	1.073	1.53132	70.0641	9.56964	18.835	36.4963	11.1375	24.0371	1.79769	7.70519	18.8262	0	1.03758	0.463346
162	43.6154	26.3476	3.34887
163	43.7657	23.116	2.39746	0.507657	0.0241912	0			14.264	53.014	32.721	12.351	1.913	1.84222	67.7125	11.1869	19.2584	36.1765	12.1987	23.145	2.0468	4.99359	21.4395	0	1.02356	0.527055
164	48.2814	19.7295	0.848945
165	48.5579	31.8299	0.544446	0.934671	0.0134736	0	7.305	-72.2	14.358	55.161	30.48	12.312	2.046	0.00740233	60.6077	19.2024	20.1825	33.8681	13.2363	10.5324	4.33749	4.6129	33.4129	0	1.42491	1.25672
166	49.2836	33.7919	0.483297
167	48.2527	27.882	0.524815			0			21.785	53.587	24.629	20.381	1.404
168	49.9157	27.6769	0.460861
169	49.4217	17.4351	1.413	0.799353	0.0195474	0.666667	7.367	-56.3	12.385	48.34	39.275	10.349	2.036	0.950832	60.2145	19.9416	18.8931	44.2909	14.0288	6.8817	4.12263	3.24299	27.433	0	2.11812	2.03856
170	43.4837	14.0115	2.98525
171	37.9681	18.3603	3.50364	0.613313	0.051141	1			13.45	51.199	35.351	11.163	2.287	1.40751	65.4516	11.8958	21.2451	37.9465	16.0325	15.847	1.95287	6.21893	22.0022	0	1.19031	1.0117
172	40.7105	26.7203	2.905
173	43.7699	31.8602	1.73212	1.11444	0.0264966	0.666667	7.23	-84	15.685	53.117	31.195	12.969	2.716	1.87738	62.2151	17.9006	18.0069	35.4844	8.0139	6.95714	3.02099	3.56841	42.9551	0	2.3702	1.1519
174	46.3262	24.4735	1.05415
175	48.1322	9.68569	0.868694	0.595669	0.0168157	0.666667			4.967	57.719	37.316	4.967	0	1.28276	67.2335	11.0057	20.478	39.1075	10.3292	14.1094	2.58634	5.83488	28.0327	0	1.60024	0.732082
176	47.6967	3.98748	1.03999
177	46.697	12.0689	0.887686			0.666667	8.117		23.737	51	25.261	16.846	6.891
178	46.0601	23.2922	1.02033
179	46.7716	37.0318	0.60747	0.967143	0.00946214	0.666667			22.932	49.616	27.453	19.277	3.655	1.35803	65.4412	16.4926	16.7082	38.7022	13.5037	8.11502	2.19773	2.60258	34.8788	0	1.79022	1.66404
180	46.388	27.4689	0.424716
181	40.7906	13.0791	2.47525	0.423655	0.0428491	6.33333	12.82	-40.2	10.6	56.416	32.987	10.27	0.33	1.41666	67.1239	11.1107	20.3487	42.9624	9.35884	19.4184	2.8229	8.52525	16.0765	0.835619	1.49293	0.481956
182	40.341	8.38468	3.40083
183	40.9194	10.343	2.63758			43.6667			8.035	57.63	34.333	7.406	0.629	2.23648	67.7699	11.0831	18.9105	35.1492	12.4809	25.8758	3.45748	6.35764	15.9908	0.688249	0.916379	0.482338
184	40.2601	8.36401	2.85632
185	42.8695	6.84531	2.88831			97.6667	15.59	-72.5	7.482	49.827	42.69	4.954	2.528
186	44.7021	5.02491	2.35492
187	44.6459	4.32022	1.90544	0.234796	0.0369955	98			3.056	55.469	41.476	3.056	0	2.53602	69.2585	10.4163	17.7892	34.5057	18.6797	26.8577	6.73344	8.44631	3.36239	1.41482	0.757745	0.695508
188	41.2283	8.17108	2.99403
189	39.586	9.64425	3.52889			94.6667	12.1	-67.4	7.467	51.012	41.521	6.034	1.433
190	40.6581	7.48972	3.06373
191	44.6881	6.60584	2.23313	0.245954	0.0443211	67.6667			9.015	51.585	39.4	8.005	1.01	2.76345	66.579	10.0772	20.5803	31.2835	17.9411	23.6774	3.99426	11.4273	10.84	0.83648	0.751672	0.75773
192	43.3277	6.23293	2.59435
193	44.2195	4.96639	2.36978			52.3333	10.58	-47	8.47	53.518	38.011	7.447	1.023
194	45.4447	4.18638	1.66519
195	47.2616	3.11006	1.1798	0.128116	0.025602	13			7.858	54.526	37.613	7.035	0.823	3.25304	66.7281	11.197	18.8219	35.2035	20.4163	26.6419	2.17755	8.11151	7.44928	0	0.748084	0.766321
196	44.571	2.56184	1.6175
197	42.9478	3.11975	2.16032	0.14159	0.0417101	0.666667	11.67	-50.1	7.029	56.364	36.607	5.814	1.215	4.11393	66.1483	11.2397	18.4981	38.2728	21.0694	27.2973	0.647288	8.14731	3.85307	0.71283	0.791304	0.771851
198	41.8892	3.50814	2.07696
199	43.9597	4.48536	2.12323			0			9.034	55.778	35.188	7.324	1.71
200	42.5013	7.80962	1.96447
201	42.4037	7.73043	2.89628	0.314266	0.0296046	2.33333	8.1	-40.8	9.518	55.614	34.872	7.635	1.883	4.33332	59.0668	14.4354	22.1645	45.3619	12.5164	18.6872	0.952971	5.70293	16.7785	0	1.45374	0.669785
202	45.0576	9.18645	1.66577
203	45.9643	6.79632	1.63205	0.287247	0.0256092	1.33333			11.159	53.52	35.322	10.519	0.64	3.01707	60.6406	18.1653	18.177	47.0783	15.1562	15.2118	0.227979	5.46458	16.8611	0	1.55026	0.99634
204	45.1192	8.93316	1.30323
205	44.4934	13.1256	1.32972	0.425831	0.0214798	0.666667	5.356	-19.1	11.877	56.826	31.297	9.791	2.086	9.35641	48.905	19.3409	22.3977	26.2239	14.8579	15.0288	0	4.94408	38.9453	0	0.877441	0.988629
206	44.0973	11.4466	0.98358
207	46.8384	11.3235	0.750659			0.666667			16.445	58.49	25.062	13.325	3.12
208	42.244	12.3603	3.3765
209	45.1765	13.0569	2.36613	0.563831	0.0241783	0	5.151		12.066	59.86	28.074	11.557	0.509	14.263	42.635	20.0751	23.0269	38.3228	15.8793	28.1156	0	10.3499	7.33244	0	0.871075	0.564787
210	46.2116	13.4457	0.741307
211	44.8463	17.2479	0.632185	0.699794	0.00907568	0			17.013	56.2	26.787	14.141	2.872	14.7887	44.9787	19.0597	21.1729	36.3535	13.9271	8.17145	0	4.65031	36.8977	0	1.64507	1.70436
212	44.7683	22.7155	0.538739
213	45.7086	21.2425	0.699756			0	5.078	-21.1	16.398	54.767	28.834	14.54	1.858
214	47.4417	22.6751	0.792227
215	43.4273	17.2524	0.943034	0.72046	0.0191254	0.666667			20.392	54.397	25.213	17.563	2.829	13.489	46.8154	19.0256	20.6701	36.4717	20.0075	8.85557	0	6.21841	28.4469	0	1.26361	2.25931
216	45.489	16.4174	1.00364
217	44.3928	13.9903	1.3069	0.439779	0.0195856	0	3.671		33.654	42.623	23.724	30.281	3.373	12.5938	46.5811	18.9216	21.9035	51.4659	10.321	15.1704	0	5.15956	17.8832	0	2.01895	0.680341
218	47.6684	9.34414	1.04759
219	49.6685	3.85961	0.541018	0.149285	0.00622714	0			8.55	52.94	38.509	6.386	2.164	1.57419	64.7215	12.8614	20.8429	38.6031	21.0329	12.0004	0	4.54119	23.8224	0	1.16861	1.75267
220	47.5095	3.39189	0.335271
221	49.1792	3.04277	0.553123			0	9.019	-71.4	9.595	51.963	38.443	8.045	1.55
222	48.2966	2.43971	1.51164
223	46.5254	3.13263	1.49763	0.107656	0.0291729	0			8.347	54.134	37.521	6.04	2.307	1.86421	64.7302	11.663	21.7426	41.7533	12.9737	31.824	0	7.3099	5.23042	0.908705	0.932041	0.407669
224	45.3627	2.46554	1.27356
225	43.4119	2.39694	1.92999			0	11.56	-70.6	7.705	52.851	39.445	6.005	1.7
226	45.5188	2.2052	1.94606
227	47.2843	3.24704	1.05089	0.10861	0.0260746	0			8.283	55.947	35.767	6.911	1.372	2.78842	63.4743	11.915	21.8224	50.7572	15.0914	22.5995	0	7.73709	3.81488	0	1.34667	0.667778
228	43.2177	3.51895	0.871157
229	44.3473	3.49413	0.631976			0	5.606		16.045	53.7	30.256	12.82	3.225
230	47.278	2.58801	1.01052
231	48.7739	1.84245	1.04211	0.0657208	0.0325109	1.33333			5.93	60.604	33.466	5.93	0	2.94517	66.7568	11.0529	19.2452	40.9595	15.5972	33.4217	0	8.20647	0.627795	1.18737	0.835586	0.46668
232	43.0706	1.85585	2.09875
233	43.3018	1.97459	2.50435	0.0718764	0.0460711	0	11.6	-70.8	9.296	57.997	32.706	7.875	1.421	2.6473	66.9439	11.594	18.8148	32.2281	20.6725	33.0218	0	8.70287	5.02391	0.350861	0.600214	0.626026
234	46.0229	1.91211	2.16208
235	46.1672	1.68727	1.76906	0.0702383	0.0428355	0			7.503	58.375	34.125	7.158	0.345	2.09838	68.8329	10.8811	18.1876	42.5363	12.6526	32.0841	0	10.1324	1.36063	1.2339	0.950813	0.394357
236		1.85358	2.1073
237				0.0734858	0.0423519	0.666667	9.845	-69.5	6.583	59.3	34.117	5.929	0.654	1.26187	72.7598	8.90167	17.0767	40.3245	13.5089	33.7037	0	8.62627	2.7217	1.11491	0.854103	0.400814

## Sheet: S2
Table S2. Occurrence depth, rock types, and weights of dropstones collected in core ARC4-BN05.
No.	Core depth (cm)	Rock type	Weight (g)
1	42-44	dolomite	5.913
2	46-48	dolomite	0.856
3	48-54	Quartz sandstone ( low metamorphic )	>200
4	50-52	dolomite	1.511
5	56-63.5	dolomite	76.2
6	112-113	igneous rock	3.092
7	121-123	quartzite	6.553
8	122-124	Quartz sandstone (low metamorphic)	7.628
9	124-126	dolomite	1.709
10	138-140	quartzite	2.345
11	142-144	Quartz sandstone	1.706
12	180-182	shale	2.676
13	218-220	quartzite	0.94
14	220-222	Greisen	8.23
15	226-228	Greisen	2.95

## Sheet: S3
Table S3. Pearson correlation coefficients for variables used in the PCA
	Ca/Al	Mn/Al	clay (%)	silt (%)	fine sand (%)	>250 (%)	PF (% >63mm)	smectite (%)	illite (%)	kaolinite (%)	chlorite (%)	quartz (%)	K-feldspar (%)	plagioclase (%)	calcite (%)	pyroxene (%)	dolomite (%)	Kfs/Plag
Ca/Al	1	0.137797	-0.0208522	-0.209186	0.183202	0.301593	0.0997163	-0.197043	0.1289	0.107155	-0.323411	-0.637989	-0.507102	-0.72361	0.443196	-0.635146	0.809498	0.334288	0.558305
Mn/Al	0.137797	1	0.565149	-0.38721	-0.429694	-0.295978	0.65556	-0.248371	0.353079	-0.375953	-0.162481	-0.324486	-0.0346767	-0.0224302	0.740961	0.0259504	-0.093593	-0.256372	-0.17562
clay(%)	-0.0208522	0.565149	1	-0.692933	-0.773937	-0.434647	0.615614	-0.434841	0.553374	-0.556612	-0.250857	-0.22485	0.00779873	-0.0775098	0.575843	0.17523	-0.0841126	-0.183839	-0.142356
silt(%)	-0.209186	-0.38721	-0.692933	1	0.093722	-0.154548	-0.411618	0.229889	-0.208082	0.120035	0.156264	0.243266	0.0365473	0.288509	-0.580281	0.0947943	-0.113046	-0.034011	-0.0112784
fine sand(%)	0.183202	-0.429694	-0.773937	0.093722	1	0.624475	-0.452531	0.43075	-0.6036	0.654242	0.251672	0.127342	-0.0452637	-0.102942	-0.267168	-0.298092	0.163712	0.272386	0.16196
＞250 (%)	0.301593	-0.295978	-0.434647	-0.154548	0.624475	1	-0.430752	0.114066	-0.287766	0.486715	-0.0500027	-0.094164	-0.0257238	-0.323923	-0.190206	-0.354883	0.38122	0.25104	0.329884
PF	0.0997163	0.65556	0.615614	-0.411618	-0.452531	-0.430752	1	-0.220872	0.278062	-0.312928	-0.068189	-0.317212	-0.0501032	-0.0129581	0.714222	-0.0341072	-0.083908	-0.23277	-0.145237
smectite(%)	-0.197043	-0.248371	-0.434841	0.229889	0.43075	0.114066	-0.220872	1	-0.794691	0.490762	0.389216	0.247018	0.143786	0.0953047	-0.283432	0.0693665	-0.113882	0.0635324	-0.0265932
illite(%)	0.1289	0.353079	0.553374	-0.208082	-0.6036	-0.287766	0.278062	-0.794691	1	-0.854925	-0.688094	-0.249443	-0.169685	-0.139087	0.247558	0.133283	0.120054	-0.0924428	-0.0217684
kaolinite(%)	0.107155	-0.375953	-0.556612	0.120035	0.654242	0.486715	-0.312928	0.490762	-0.854925	1	0.387515	0.140484	0.0790905	-0.0437561	-0.180897	-0.306398	0.0682901	0.245435	0.233826
Chlorite(%)	-0.323411	-0.162481	-0.250857	0.156264	0.251672	-0.0500027	-0.068189	0.389216	-0.688094	0.387515	1	0.228207	0.212842	0.380213	-0.110546	0.000687116	-0.337892	-0.195433	-0.281075
Quartz(%)	-0.637989	-0.324486	-0.22485	0.243266	0.127342	-0.094164	-0.317212	0.247018	-0.249443	0.140484	0.228207	1	0.0645103	0.354592	-0.409713	0.270569	-0.602873	0.338373	-0.326348
K-feldspar(%)	-0.507102	-0.0346767	0.00779873	0.0365473	-0.0452637	-0.0257238	-0.0501032	0.143786	-0.169685	0.0790905	0.212842	0.0645103	1	0.442746	-0.226369	0.446995	-0.535164	-0.631677	0.0678675
Plagioclase(%)	-0.72361	-0.0224302	-0.0775098	0.288509	-0.102942	-0.323923	-0.0129581	0.0953047	-0.139087	-0.0437561	0.380213	0.354592	0.442746	1	-0.259661	0.520563	-0.867905	-0.642355	-0.592344
calcite(%)	0.443196	0.740961	0.575843	-0.580281	-0.267168	-0.190206	0.714222	-0.283432	0.247558	-0.180897	-0.110546	-0.409713	-0.226369	-0.259661	1	-0.331708	0.107211	-0.0176898	0.02125
pyroxene(%)	-0.635146	0.0259504	0.17523	0.0947943	-0.298092	-0.354883	-0.0341072	0.0693665	0.133283	-0.306398	0.000687116	0.270569	0.446995	0.520563	-0.331708	1	-0.603701	-0.425472	-0.318905
dolomite(%)	0.809498	-0.093593	-0.0841126	-0.113046	0.163712	0.38122	-0.083908	-0.113882	0.120054	0.0682901	-0.337892	-0.602873	-0.535164	-0.867905	0.107211	-0.603701	1	0.455751	0.53576
Qua/Fsp	0.334288	-0.256372	-0.183839	-0.034011	0.272386	0.25104	-0.23277	0.0635324	-0.0924428	0.245435	-0.195433	0.338373	-0.631677	-0.642355	-0.0176898	-0.425472	0.455751	1	0.213779
Kfs/Plag	0.558305	-0.17562	-0.142356	-0.0112784	0.16196	0.329884	-0.145237	-0.0265932	-0.0217684	0.233826	-0.281075	-0.326348	0.0678675	-0.592344	0.02125	-0.318905	0.53576	0.213779	1

## Sheet: S4
Table S4. Downcore distribution of the PCA scores
Depth (cm)	MIS	PC1	PC2	PC3	PC4	PC5
1	1	1.13809	-0.09899	0.46482	-0.44746	0.14679
5	1	1.23888	-0.18135	0.74585	-0.40398	-0.00658
9	1	0.51703	-0.63716	0.2096	0.87044	-0.27068
15	3	1.23617	-0.20466	0.68551	0.17864	-1.15779
17	3	0.20165	-0.8032	0.71478	2.18471	0.64317
19	3	0.44385	-0.04901	0.70882	2.33397	1.02391
21	3	2.35146	0.93521	-0.58925	1.81328	0.41799
25	3	0.67288	0.93167	-0.28248	-1.87388	2.15572
27	3	0.07509	1.67813	-1.12268	-1.15659	1.9633
31	4	-0.31744	2.06379	-1.1321	-0.2876	0.94413
35	4	0.91696	-0.32678	0.2369	-2.61232	0.24215
39	4	-0.21329	2.16381	-1.85792	-0.02848	2.06163
41	4	-0.43598	1.65713	-0.95721	-0.88947	2.11807
45	5a	1.22043	0.07883	0.04349	0.08125	-0.64371
47	5a	0.69929	0.12747	0.37088	1.06615	0.20366
51	5a	0.82721	-0.5138	-0.16615	0.01295	1.03717
55	5a	1.36055	0.39378	-0.67849	0.12904	0.03601
57	5a	1.46111	0.21051	-1.05132	0.27994	-0.29538
59	5b	0.51228	0.17519	0.20093	0.42353	-0.84017
61	5b	0.9444	0.28833	0.43908	0.25564	-0.43315
65	5c	2.58155	0.6478	0.41315	-0.45276	-0.96672
67	5c	2.24852	0.28065	-0.27699	-0.31518	-0.62902
69	5c	1.63911	0.08287	0.24541	-0.90907	-0.81865
73	5c	0.71497	-0.00913	-0.63943	0.36925	-1.39761
77	5d	0.66292	0.00597	0.34797	2.54417	1.52921
81	5e	1.52435	-0.41265	-0.14005	0.64662	-0.30721
83	5e	1.20672	0.05749	0.4077	-1.19923	-0.97925
85	5e	1.37324	0.24101	-0.803	0.63316	-0.80229
87	5e	0.21786	0.1873	-1.07103	0.2725	-0.66541
91	6	-1.1172	1.07268	-1.46428	-0.56255	0.27304
95	6	-1.41264	1.53536	-1.51297	-0.16184	-0.44073
99	6	0.83375	-1.06127	-0.23199	-0.2195	0.66097
103	6	-0.36125	-1.4068	-0.26136	-1.05794	0.205
107	7	0.83806	-1.07445	-0.47644	-0.31374	-0.04783
109	7	1.22794	-0.53515	-0.10911	0.9283	-0.83785
113	7	0.51179	-0.69939	0.43896	-0.63459	0.01313
117	7	-0.01351	-0.37786	-0.08908	0.20052	-1.32917
121	7	0.66932	-1.03505	0.75361	-1.65938	1.24931
125	7	0.09556	-1.18722	0.52898	-0.84547	1.37983
129	7	0.16772	-0.73399	0.11446	-1.46372	-0.13588
133	7	0.30253	-0.50748	0.02727	-1.18892	-0.19481
137	8	-0.5914	-0.41645	0.23437	0.49272	1.46371
139	8	-0.4146	-0.81509	0.53545	0.24393	2.59305
141	8	-0.44356	-1.20617	-0.10581	-0.00715	1.27325
143	8	-0.22995	-0.85832	0.28601	-0.12281	0.7177
147	8	-0.64755	-0.21619	0.95855	1.61824	-1.03133
149	8	-1.08024	-0.01346	5.19836	-0.78214	0.14953
151	8	-1.15474	-1.29414	1.26547	-0.20339	1.12399
153	9	-0.80603	-1.06103	0.21691	-0.00514	0.4005
157	9	-0.61182	-0.96292	-0.57143	-0.72313	0.18377
161	9	-0.67556	-1.14659	-0.72269	0.36042	-0.47048
163	10	-1.03925	-0.77648	-0.86574	0.76825	0.35019
165	10	-0.94468	0.15715	0.49834	0.95992	0.19054
169	10	-0.18571	0.33149	1.33458	0.67074	0.22151
171	10	-0.49292	-0.3457	-0.10419	0.087	0.35617
173	10	-0.85114	-0.08074	0.66782	2.28091	0.15818
175	10	-1.179	-0.49434	-0.06984	1.39164	-1.64565
179	10	-0.98855	-0.48251	0.81651	0.99541	1.53757
181	11	-0.99253	-0.51505	-0.95445	1.26168	-1.03503
187	11	0.06393	-0.35235	-0.19309	-0.83158	-1.60797
191	11	-0.02313	-0.2294	-0.1546	-1.09099	-0.75503
195	11	-0.80306	-0.43157	-0.13058	-1.20836	-0.56958
197	11	-0.92624	-0.39692	-0.1573	-1.31553	-0.60208
201	11	-0.78679	0.48119	-0.51558	0.74976	-0.61164
203	12	-0.80133	0.26865	0.22068	0.26869	-0.54451
205	12	-0.90564	1.86806	0.92023	0.06557	-0.90004
209	12	-0.97184	2.90296	0.08305	-0.57541	-1.93324
211	12	-0.96163	2.68248	1.91099	0.35897	-1.1028
215	12	-0.84015	2.53841	2.34216	-1.04434	-0.52626
217	12	-0.16405	2.25752	-0.52235	1.21703	1.52985
219	12	-0.89813	-0.20246	1.11335	-0.98605	-0.10734
223	13	-0.90418	-0.54309	-1.4913	0.06867	0.10819
227	14	-0.97167	-0.09497	-0.8328	0.03934	-0.64947
231	14	-1.46271	-0.49945	-1.11598	-0.24154	-1.32332
233	15	-1.21318	-0.6246	-0.64123	-1.25888	-0.2471
235	15	-1.3501	-0.93107	-1.30019	-0.0183	-0.98131
237	15	-1.51284	-1.45642	-1.33851	-0.02455	-0.81778
